# Supplementary material for: An integrated multi-fingerprint sensitivity-nested approach for regional model parameter estimation and catchment similarity assessment
Source: Copernicus journal article supplement (doi:10.5194/hess-2016-249), 2016-06-17
Supplement: Supplementary file [file hess-2016-249-AC1-supplement.pdf]

Response to B. Guse (Referee)

Received and published: 15 July 2016

**Björn Guse (BG):** In this manuscript, Höllering et al. provide an approach to obtain a better understanding of model parameter behaviour and a more process-based model parameter estimation under consideration of spatial variations. For this, they used at first a fingerprint analysis to investigate how well the model performs for different aspects of the hydrological system. Second, a temporally resolved parameter sensitivity is used to detect the dominant model parameters along the time series. Overall, I really like the idea of this approach. However, I think that the core ideas of this study needs to be clarified. The introduction is not appropriate and needs to be reworked (including references). Furthermore, I think that the presentation of the results in the figures can be improved (also in their quality) and condensed, while the interpretation towards the overall benefit for the hydrological community can be enhanced. Thus, I recommend a major revision of this manuscript. For this, I make several recommendations below.

**Simon Höllering (SH):** We thank referee Björn Guse for his critical and helpful assessment of our manuscript.

## MAJOR COMMENTS

### 1. Introduction:

**BG:** The introduction needs to be completely reworked and restructured. I see here several reasons for this recommendation. The introduction is not related to the abstract. It is very surprising that the introduction starts with catchment classification / similarity after reading the abstract. Further, In the methods and results, the performance (fingerprint) analysis and the temporal parameter sensitivity analysis have at least the same priority. An introduction into the state-of-the-art in parameter sensitivity and more specifically on temporal parameter sensitivity analysis is completely missing. There are several studies in recent years using a temporally resolved sensitivity analysis and trying to extract helpful information for parameter understanding. Please see among others: Guse et al. (2014, 2016), Herman et al. (2013a, b), Massmann and Holzmann (2012), Massmann et al. (2014). Furthermore, I am not satisfied with the introduction into performance analysis in terms of fingerprint analysis and parameter constraints. Also here, there are several recent advances which need to be considered here to see this study in the context of the state-of-the art in research. Exemplarily please see: Euser et al. (2013, 2015), Gharari et al. (2014), Pfannerstill et al. (2014), Pokhrel et al. (2012), Reusser et al. (2009). Thus, it is certainly required to extract in a better way the novelty of this approach in the context of temporal parameter sensitivity analysis, performance analysis and constraints for model parameters compared to the state-of-the art.

**SH:** We admit that the introduction should be streamlined to better reflect/lead to the key objectives of this study. One is certainly the question of what to learn from parameter sensitivity in different catchments, this is what we paraphrase as "regional sensitivity". The other is to shed light on the usefulness of catchment fingerprints for parameter identification. We think that the FAST method is well suited to address both objectives and we are happy to refer to the studies listed by Björn Guse, -in case they are relevant-

### 2. Objectives:

**BG:** Following of my comments on the introduction, the objectives are not clearly enough motivated. Please check in the introduction whether all objectives are really motivated in the introduction. According to the current version of the introduction, I do not see a clear reason why it is relevant to constraint parameters in relation to different flow conditions or whether it is required to look at parameter sensitivity to understanding spatial distributed catchment behaviour. Certainly, I agree to both research questions, but I do not agree with their motivation.

**SH: We will rework the introduction and the related objectives, as stated above.**

### 3. Concept and methods:

**BG:** According to my understanding of the manuscript, the three pillars are not really representing the article. The major point seems to be the third part. The second point is not very specific (stream flow generation). I would recommend to emphasize here more the general idea by shortly explaining how the different parts are related and which benefit is intended to obtain by the different steps. This is currently a bit unclear. Especially when presenting the concept, a clear structure is required. Maybe a flowchart would be more helpful than a list of five steps.

**SH: We thank for this important point, the study is mostly focused on the two pillars - suitable indices to characterise stream flow generation as well as partial parameter sensitivities. We will clarify this part and possible add a flow chart.**

**BG:** The link between the introduction and the concept is also not clear. Catchment classification dominates the introduction, but is not included in four of the five research steps. The authors should think about directly considering the relationship between parameter sensitivity and dynamic fingerprints. This aspect is somehow missing at the end and could provide helpful insights into parameter understanding.

**SH: This is a great idea, we tried to achieve this with Figure 11, which relates the FDC and the highest parameter sensitivity for two different catchments. Highest sensitivities are quite different for both catchments. We will further explore this relation in the revised manuscript and elaborate on the related hydrological insights.**

### 4. Results:

**BG:** There is a huge amount of figures showing the results. My impression is that due to the content of the figures (and the different subplots), the overall goal of this study is somehow lost. I strongly recommend to focus on figures showing the major outcomes.

In the results (5.3), it is not clear which knowledge is really gained by using the best selected model runs for a certain fingerprint (Fig. 7a). I think that we are more interested in overall best performing model runs combining different indices than in having a model runs which is the best in relation to a single fingerprint. I had expected a presentation of a joined metric combining all fingerprints such as e.g. shown in Pfannerstill et al. (2014) or Haas et al. (2016), so that a model run could be finally selected which performs well for all fingerprints. In my opinion, this would be a reasonable final result of this part.

**SH: We will reduce the richness of figures to portray the main findings. A first guess on could at least hope, that parameter sets which reproduce well selected fingerprint would also perform well during a streamflow simulation. As this did not work out we selected parameter sets which perform well for at least 2 fingerprints, with moderate success. A number of 91 runs is surely too small to find parameter sets which work well for most of the fingerprints.... Next it might be interesting to select the parameters**

**in a different manner to represent different characteristics of stream flow (runoff generation parameters for magnitude, recession parameters for timing) as well as to optionally include a master recession curve as fingerprint or related recession indices. A joint metric to judge the performance of parameter sets with respect to different fingerprints is also an interesting option.**

**BG:** A discussion of the results in the context of the state-of-the-art and of how these results are related to knowledge obtained by former studies in this topic is missing. Concerning this, please see among others the list of references at the end.

I really like the expression Sensitivity duration curve (SDC). It is especially good to see that in this case differences between the catchments were detected. This is contrast to Guse et al. (2014) where a similar presentation (Fig. 6, even when it was not named Sensitivity duration curve) did not show relevant differences (due to a lack of spatial heterogeneity).

**SH: We will relate our findings to the those of recent studies recommended by BG and particularly refer to BG paper in the respect of sensitivity duration.**

**BG:** Maybe the authors could think about a final figure summarizing the results qualitatively. An example for this could be found in Fig. 9 in Herman et al. (2013a). Discussion and conclusion:

Concerning the stated research questions, I think that the first research question is not really solved. I agree that fingerprints can help in constraining parameter ranges. However, this was also expected, since each hydrologic metric can somehow constraint parameter range. Here, I miss either a method to select overall behavioural parameter sets based on all (or all not correlated ones) fingerprints or a hydrological explanation that a certain fingerprint is able to constrain a parameter range since it represents the associated parameter accurately or something similar.

**SH: Good point, we will find a way to better summarize overall results and discuss the value of overall behavioural parameter sets in terms of constraining the parameter space if the whole set of response fingerprints is considered.**

The sentence on P. 18, L. 26-27 "We further found..." really makes a strong difficulty apparent. The results that the parameter values (or constraints) are largely varying between the different behavioural parameter sets are problematic since it is then difficult to estimate the "best" parameter values. I encourage the author to discuss this point more in detail by suggesting possible way towards an overall behavioural parameter set.

**SH: An alternative interpretation is that these changes show either that the sample is too small or they suggest that the model structurally inadequate. A perfect model should yield parameter sets which consistently reproduce at least related signatures.... if this is not the case, although the model yields a good NSE, this might be due to structural inadequacy of the model.**

**BG:** In this context, I think that a more profound discussion of the relationship between the performance of fingerprints and model parameters would be helpful. At the end of the answer to research question 2 (P. 19, L. 6-16), the consistency between sensitivity duration curves and hydrologic fingerprints can be discussed. Do the spatial patterns of both are consistent?

**SH: We will improve the discussion in the revised manuscript along these lines.**

5. Figures:

**BG:** All figures: Overall, please check which are the most important figures and which are of less importance and could be removed/reduced.

In relation to this, several figures are not clear enough in terms of their intention and the visibility of the results. In particular, the description of the results in the figures (e.g. Figs. 5 and 7) is sometimes difficult to grasp. Concerning this remark, please see also the following comments to the figures.

**SH: We will reduce the number of figures to the minimum necessary amount.**

**BG:** Fig. 5: This figure needs to be improved. It is impossible to extract the information of the relationship between same coloured points and the circle. One idea could be a reduction of the selected stations (in this plot) and/or a quadratic plot (increase of the plot height). Another idea could be to add a table (maybe as acknowledgement) stating how many points are within the circles. To summarize this comment: It should be possible to extract the information of how many points are in a circle somehow.

**SH: Good point, we will find an appropriate presentation for this.**

**BG:** Fig. 6: I do not understand why and how the sample space is defined by the observed quantities in a fingerprint. Here, a clear approach is missing. I can agree that in the best case all simulations should be in the range as defined by the observed values of all stations. However, how is this related to the parameter space? This requires at least a detection of the parameter values leading to the fingerprint values as well as a clear relationship between parameter value and fingerprint. Maybe I understand something wrong here, but for me it seems to be that an information is missing here. It is really crucial for this study to understand this point.

**SH: This is a misunderstanding. Figure 6 shall corroborate that the fingerprints of the fast ensembles spread across different ranges for the different catchments. As the variation of parameters was the same, this indicated regional how differences in forcing data, propagate into FAST. Second the plot shows that the fingerprints differ for the different catchments, i.e. they are sensitive to regional differences and third it shows that the envelopes are highly skewed.**

**BG:** Fig. 7a: This sub-figure needs to be completely reworked and improved. I cannot extract the relevant information. There is too much information: Seven sites as colours, six fingerprints as symbols and two metrics as well as the number of the best performing model run. One idea could be a plot in similar way as Figs. 1-6 in Bastidas et al. (2006). In this case, a separate plot could be shown for each performance metric.

**SH: We will rework this figure to better portray the main finding. We agree that there is too much information in it.**

## 6. MINOR COMMENTS:

**BG:** Abstract, first sentence: I think that the first sentence should be more general. It is not clearly apparent why parameters need to be identified in relation to parameter sensitivity and catchment classification.

**SH: Yes, we are thinking about a more general/clear formulation.**

**BG:** Abstract, second sentence: This sentence is certainly too long. Please subdivide this sentence into two (or even three) to avoid losing the reader directly at the beginning.

**BG:** Abstract: The numbering (1), (2) and (3) is not explained and thus not understandable.

**SH: We split the long sentence and removed the numbering.**

**BG:** The referencing should be consistent. To give an example: On Page 5, Line 25, the three references are neither ordered by occurrence nor alphabetic. Please check this in the whole text.

**SH: Yes, thanks, corrected.**

**BG:** At several parts of the manuscript, the transitions between the different subchapters are not clear. I recommend to check the beginning and the end of the different chapter and if required add a sentence to relate both chapters. One example for this is the beginning of chapter 5.4.

**SH: We will incorporate transitions to improve readability where it is needed.**

**BG:** P. 7 L. 3: Why do you use only six parameters which only explain less than the half of the variance?

**SH: The selection of six parameters originated from a pre-study, were a local sensitivity analysis was performed to find out sensitive parameters in terms of different indices for streamflow dynamics and water balance. 14 parameters were identified as most sensitive in this way and used for a pre-run of FAST whereby the six most influential parameters were kept to demonstrate the feasibility of our approach with a comparably small amount of model runs/time to be spent on simulation. We think about restructuring the parameter pre-selection for future publication.**

Later in the text (P. 15, L. 24), it is mentioned that even on the day with the highest sum of the partial sensitivities, this value is lower than 0.5. I think that a good reasoning for this is required. Even though that I am aware that it is not useful to do a temporal sensitivity analysis with all model parameters, I am curious whether it is possible to increase the explaining variance by using e.g. 8 or 10 parameters. Or otherwise, could you explain why a higher number of parameters is not beneficial/possible?

**SH: Yes, this might be demonstrated later in a different study, where more parameters might be included as well.**

**BG:** P. 7, L.11: I would recommend to write here: "In the case of using six parameters, the FAST method requires altogether 91 model runs..." It should be highlighted that the number of model runs depends on the model parameters and is provided by the FAST methods meaning that the same number of model runs is required for the same number of parameters independently from model, catchment or parameter selection.

**SH: Yes, we corrected it and will further clarify this part.**

**BG:** P. 7, L.25: Here, 91 model runs are used to identify values for six parameters. This approach is certainly in contrast to typical model calibration algorithms using a significantly higher number of model runs for the same number of parameters. Even when I agree of using this approach for this study, I think that it is required to mention that a lower number of model runs is acceptable here according to capture all goals of this study. Or other way round, it is required to say that this number of model runs has to be certainly higher when only focusing on model optimization.

**SH: Good point! We will consider this in the revised manuscript.**

**BG:** P. 8, L. 6: Which are the five classes?

**SH: We added a reference to table 2 showing the five classes.**

**BG:** P. 8, L. 17: There are more than six hydrologic fingerprints in Table 2. Could you explain why you mentioned here "six" hydrologic fingerprints?

**SH: This is a misunderstanding. There are six fingerprints (including BFI) which characterize the dynamic response of catchments (hydrological). The other part of the table shows the physiographic characteristics. We will rework this table to avoid misunderstanding.**

**BG: P. 8, L.19: Which one (of the dynamic fingerprint)?**

**SH: We change it to be better understandable.**

**BG: P. 8, L. 26: I would recommend to write: "from each of the simulated..."**

**SH: Yes, corrected.**

**BG: P. 8, L. 30: I think that here and maybe also in the introduction a discussion of the PAWN method is missing as proposed by Pianosi and Wagener (2015) since the role of different performing model results within the sensitivity analysis is directly included in PAWN.**

**SH: Yes, this seems to be interesting in the context of using global sensitivity analysis. We will try to consider this approach in the introduction part.**

**BG: P. 9, L.-10-25: I recommend to also refer here to the work from Pfannerstill et al. (2015) and Pokhrel et al. (2012). In both studies FDC and their segments are used to identify (constrain) parameter values.**

**SH: Yes, thank you for the hint.**

**BG: P. 11, L. 12-13 (Fig. 5): Could you explain why you used circles assuming that the variation are similar for both variables. Is it maybe more useful to use an ellipse (which it would be in the case of a quadratic plot)?**

**SH: As a qualitative constraint a circle defined by its radius was in our opinion enough to show the feasibility of the approach and capture its goals adequately. Nevertheless, an ellipse might be an even better choice.**

**BG: P. 11, L. 12-16: I did not understand how the radius is selected and why it has this size.**

**SH: Please also refer to the previous point. For each radius a scaling factor is introduced which can be regarded as a measure of distance orientated towards the overall data spread of the 14 derived 15 values of one fingerprint. The factor is determined as a multiple n of the average of the two standard deviations of the pairs of fingerprints and shows up to be a feasible graphical measure to distinguish behavioural from non-behavioural sets for a pair of fingerprints.**

**BG: P. 11, L. 21: Could you explain why you mentioned both distance measures? Is it maybe more appropriate to select one (the best) of them?**

**SH: Yes, we should focus on one them.**

**BG: P. 12, L. 21-28: Which result (figure) supports this text passage?**

**SH: There was no figure submitted which shows the result for the BFI. We will add it or remove this part in the revised manuscript.**

**BG: P. 13, L. 20: Please explain why you have selected these seven gauging stations**

**SH: We will add an explanation why we selected a subset of seven gauges.**

**BG: P. 14, L. 2: Why do you selected four fingerprints and calculate an Euclidean distance between them. Why not using all fingerprints?**

**SH: As stated earlier a joint metric to judge the performance of parameter sets with respect to all fingerprints is also an interesting option and might be used in a revised version.**

**BG: P. 14:** I have expected a clearer description of the intention of each subplot of Fig. 7 and a presentation of the major outcome of each subplot.

**SH: We will rework the presentation of Fig. 7 and its outcome.**

**BG: P.16, L. 26:** Please add here or later in the discussion that the relationship of parameter sensitivities and FDC (or sorted discharge) was already captured e.g. in Herman et al. (2013b) and Guse et al. (2016) if not already included in the introduction after revision.

**SH: Yes, this might be important here or better earlier in the introduction.**

**BG: P. 16, L. 29:** Is there a reason why two observed and only one simulated station are used in Fig. 11?

**SH: This is for the reason of legibility and due to poor model performance of one of the two stations.**

**BG: P. 20, L. 21:** I would recommend to structure the discussion in two sub-chapters to avoid a misunderstanding evoked by a double-use of the numbers 1-3 in the discussion. The second sub-chapter in the discussion could start at this line.

**SH: This is a good idea.**

**BG: P. 21, L. 12:** Why not directly increasing the number of parameters in this study?

**SH: As stated above and in the manuscript the number of parameters and the parameter itself were preselected in a previously carried out local sensitivity study. We regard the number of parameter as sufficient to test the feasibility of our approach and the selection makes sense in respect to the fingerprints we use here. A higher number of parameters would also considerably increase the number of necessary model runs, and with this compromise a key advantage of FAST. We agree that the additional variation of parameters or for instance a recession parameter could provide additional insight, but not necessarily for the selected fingerprints.**

**BG: Fig. 1:** I do not see the relationship between the FAST sampling design the parameter values in the calibration. Why do you show both in one plot? Which information can be derive from this relationship? Furthermore, due to the different ranges of the parameters, the interpretation of the parameter values is rather difficult.

**SH: We agree with the reviewer and will remove the calibrated parameters from the revised manuscript.**

**BG: Fig. 1, caption:** Please changed to "parameter values in the 91 model runs according to the FAST sampling" or a similar expression.

**SH: Yes, changed.**

**BG: Fig. 2:** Please increase the labels a and b in the figure.

**SH: Yes, changed.**

**BG: Fig. 2:** I strongly recommend to subdivide this figure into two plots showing separately hydrologic fingerprints and the dynamics response.

**SH: This might be a good point to consider for the revision.**

**BG:** Fig. 2b: The lines in the dynamic response fingerprints are unclear.

**SH: An explanation of the lines will be added**

**BG:** Fig. 3: Do you really need this figure? I do not see the real benefit.

Fig. 3: Yilmaz et al. (2008) made a FDC segmentation at 20% and not at 30% of flow exceedance.

Fig. 3: Are you showing here the 91 model runs as FDC? In this case it would suggest to clarify this by stating this.

**SH: We will probably remove this in the revision of the manuscript or further clarify your points.**

**BG:** Fig. 4: Since the gauges and their abbreviation are used several times in the manuscript, I strongly recommend to increase the labels in size. Maybe a white background (for the labels) would be helpful in addition.

**SH: Yes, this is certainly helpful.**

**BG:** Fig. 7: Please think about the benefit of each subplot.

Fig. 7: The legend to the gauges belongs to Fig. 7a and not 7f.

Fig. 7b: Please discuss in the text why the best performing run in relation to SLFDC is among the worst runs related to NSE.

**SH: Fig. 7 will be optimized and its discussion clarified.**

**BG:** Fig. 8: Please add in the figure caption that the numbers in brackets in the legend are the numbers of the model runs.

**SH: Added.**

**BG:** Fig. 10: Please explain in a better way: "highest parameter sensitivity related observed hydrograph".

**SH: Changed.**

**BG:** Fig. 11: It seems to be that the major information from these plots could be extracted in a simpler way. I do not think that the grey lines are required. What about showing only the changes in the dominant parameters as a line (or a row) for each gauge.

**SH: Yes this might be a good and interesting idea to optimize this figure.**

**BG:** Fig. 12: Maybe the legend could be shown only once and outside of the plot at the right side (only a very minor comment).

**SH: Yes, we also think about showing SDCs of all the six parameters.**

7. Technical corrections:

**BG:** P.1, L. 10: sensitivity

**BG:** P.4, L. 16-18: This sentence does not read well.

**BG:** P. 5, L.6: I recommend to use the paper of Reusser et al. (2011) instead of the dissertation work (Reusser 2010).

**SH: Thank you, we corrected all of the technical shortcomings you stated.**

8. References:

**BG:**

Bastidas LA, Hogue TS, Sorooshian S, Gupta HV and Shuttleworth WJ (2006): Parameter sensitivity analysis for different complexity land surface models using multicriteria methods, *J. Geophys. Res.*, Vol.11, D20101, doi:10.1029/2005JD006377.

Euser T, Winsemius HC, Hrachowitz M, Fenicia F, Uhlenbrook S and Savenije HHG (2013): A framework to assess the realism of model structures using hydrological signatures, *Hydrol. Earth Syst. Sci.*, 17(5), 1893-1912.

Euser T, Hrachowitz M., Winsemius HC and Savenije HHG (2015): The effect of forcing and landscape distribution on performance and consistency of model structures, *Hydrol. Process.* 29(17), 3727-3743.

Gharari S, Shafiei M, Hrachowitz M, Kumar R, Fenicia F, Gupta HV and Savenije HHG (2014): A constraint-based search algorithm for parameter identification of environmental models, *Hydrol. Earth Syst. Sci.*, 18, 4861-4870.

Guse B, Reusser DE and Fohrer N (2014): How to improve the representation of hydrological processes in SWAT for a lowland catchment – temporal analysis of parameter sensitivity and model performance. *Hydrol. Process.* 28: 2651–2670.

Guse B, Pfannerstill M, Strauch M, Reusser D, Lüdtkke S, Volk M, Gupta H and Fohrer N (2016): On characterizing the temporal dominance patterns of model parameters and processes, *Hydrol. Process.*, 30(13), 2255-2270.

Haas M, Guse B, Pfannerstill M and Fohrer N (2016): A joined multi-metric calibration of river discharge and nitrate loads with different performance measures, *J. Hydrol.*, 536, 534-545.  
Herman JD, Kollat JB, Reed PM and Wagener T (2013a): From maps to movies: high resolution time-varying sensitivity analysis for spatially distributed watershed models. *Hydrol. Earth Syst. Sci.* 17: 5109–5125.

Herman JD, Reed PM and Wagener T (2013b): Time-varying sensitivity analysis clarifies the effects of watershed model formulation on model behavior. *Water Resour. Res.* 49. DOI:10.1002/wrcr.20124.

Massmann C and Holzmann H (2012): Analysis of the behavior of a rainfall–runoff model using three global sensitivity analysis methods evaluated at different temporal scales. *J. Hydrol.* 475: 97–110.

Massmann C, Wagener T and Holzmann H (2014): A new approach to visualizing time-varying sensitivity indices for environmental model diagnostics across evaluation timescales. *Environ. Model. Softw.* 51: 190–194.

Pfannerstill M, Guse B and Fohrer N (2014a): Smart low flow signature metrics for an improved overall performance evaluation of hydrological models. *J. Hydrol.* 510: 447–458.

Pianosi F and Wagener T (2015): A simple and efficient method for global sensitivity analysis based on cumulative distribution functions, *Environ Model Softw.* 67, 1-11.

Pokhrel P, Yilmaz KK and Gupta HV (2012): Multiple-criteria calibration of a distributed watershed model using spatial regularization and response signatures. *J. Hydrol.* 418: 49–60.

Reusser DE, Blume T, Schaefer B and Zehe E (2009): Analysing the temporal dynamics of model performance for hydrological models. *Hydrol. Earth Syst. Sci.* 13: 999–1018. Interactive comment on *Hydrol. Earth Syst. Sci. Discuss.*, doi:10.5194/hess-2016-249, 2016.

**SH: Thank you for this reference list. We will add citations to these references.**
